# Supplementary material for: Precisely regulating the acidity of mesoporous silica on the catalytic performance of 1-decene oligomerization
Source: Royal Society of Chemistry journal article supplement (doi:10.1039/d1nj00279a), 2021-01-01
Supplement: d1nj00279a2.pdf [file d1nj00279a2.pdf]

## Supporting Information

### **Precisely regulating the acidity of mesoporous silica on the catalytic performance for 1-decene oligomerization**

Cunhui Zhou<sup>a,b</sup>, Wenqian Li<sup>b,c</sup>, Minghuang Qiu<sup>b</sup>, Wanting Li<sup>b,c</sup>, Honglei Liu<sup>b,c</sup>,

Hongjiang Liu<sup>a</sup>, Kun Zhang<sup>\*d</sup>, Xinqing Chen<sup>\*b,c</sup>

*<sup>a</sup>Department of Chemistry, School of Science, Shanghai University, Shanghai 201900,  
China.*

*<sup>b</sup>CAS Key Laboratory of Low-carbon Conversion Science and Engineering, Shanghai  
Advanced Research Institute, Chinese Academy of Sciences, Shanghai 201210, China.*

*E-mail addresses: chenxq@sari.ac.cn*

*<sup>c</sup>University of Chinese Academy of Sciences, Beijing 100049, China.*

*<sup>d</sup>Shanghai Key Laboratory of Green Chemistry and Chemical Processes, School of  
Chemistry and Molecular Engineering, East China Normal University, Shanghai  
200062, China. E-mail addresses: kzhang@chem.ecnu.edu.cn*

*\*Corresponding author.*

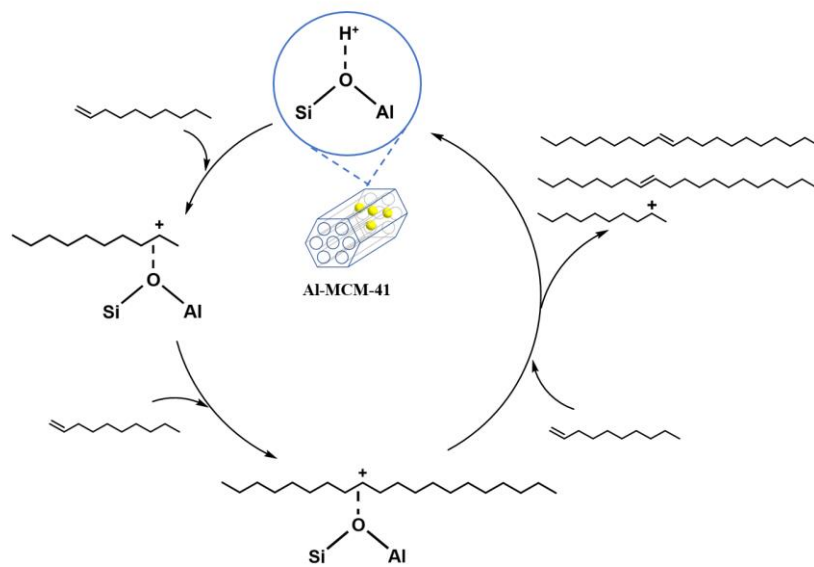

Scheme S1 Recycling plot for the 1-decene oligomerization.

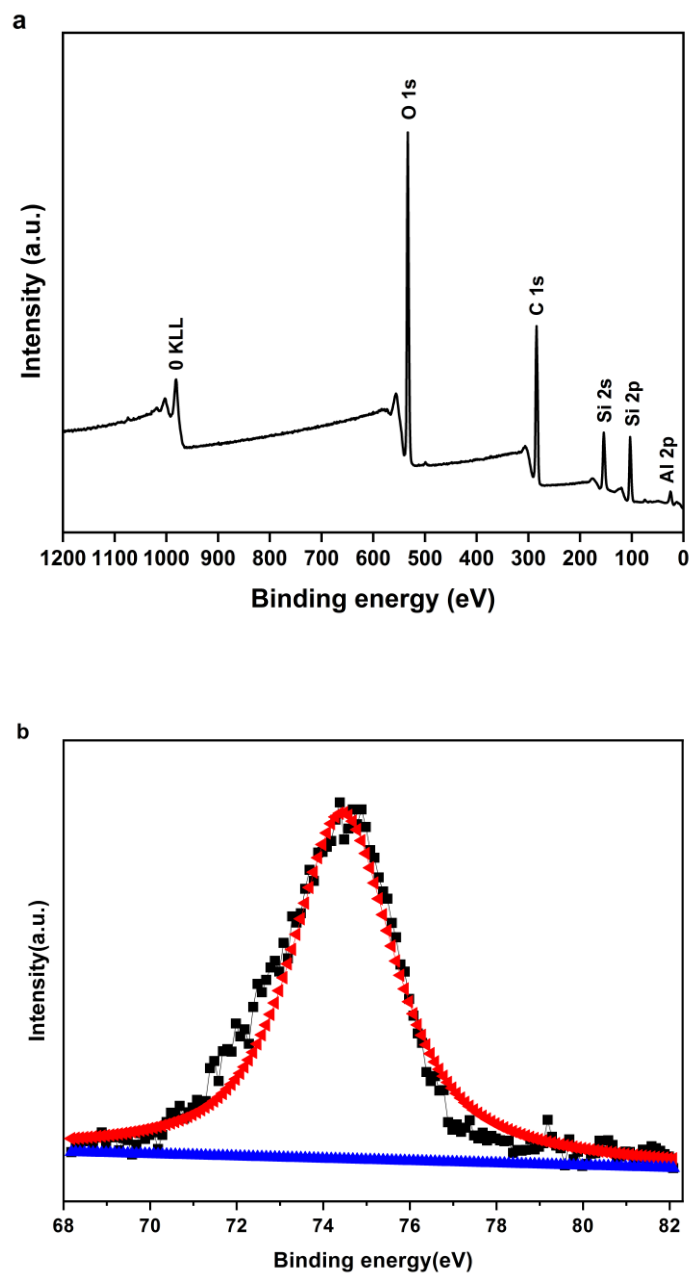

Fig.S1 XPS spectra of Al-MCM-41-15 sample: whole-range (a) and Al 2p (b) regions.

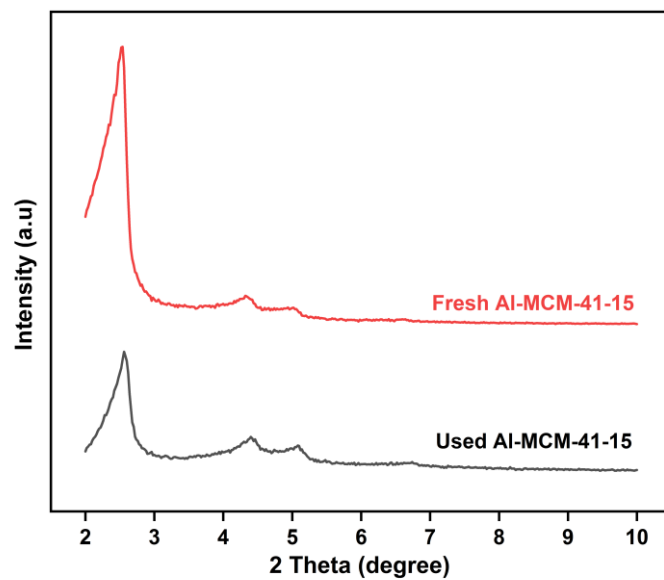

Fig. S2 XRD patterns of fresh Al-MCM-41-15 and used Al-MCM-41-15 samples

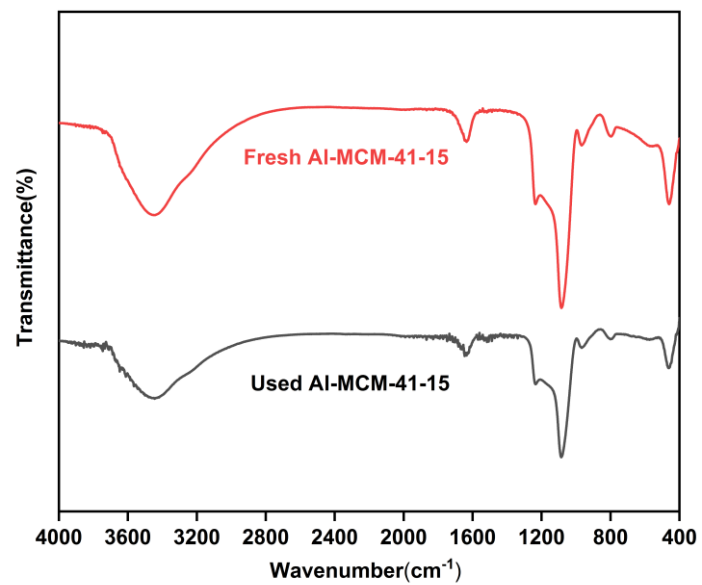

Fig. S3 FT-IR spectra of fresh Al-MCM-41-15 and used Al-MCM-41-15 samples.

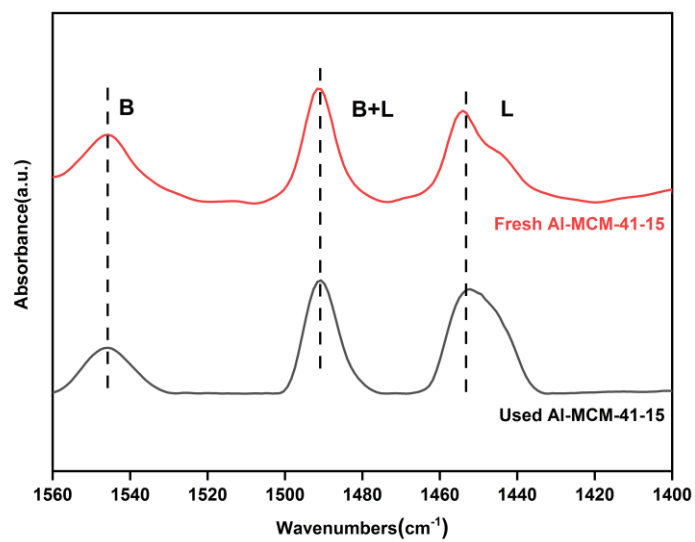

Fig. S4 Py-IR spectra of fresh Al-MCM-41-15 and used Al-MCM-41-15 samples after the adsorption of pyridine at 250 °C

Table S1. Screening test of different solvent on 1-decene oligomerization.

| Solvent   | Conversion<br>[C <sub>10</sub> , %] | Cracking<br>selectivity<br>[%] | Selectivity<br>[C <sub>20</sub> , %] | Selectivity<br>[C <sub>30+40</sub> , %] | Target product<br>selectivity [%] |
|-----------|-------------------------------------|--------------------------------|--------------------------------------|-----------------------------------------|-----------------------------------|
| n-hexane  | 56.19                               | 22.85                          | 59.55                                | 17.60                                   | 77.15                             |
| n-heptane | 70.06                               | 3.29                           | 64.53                                | 32.18                                   | 96.71                             |
| n-octane  | 56.51                               | 5.82                           | 77.76                                | 16.42                                   | 94.18                             |

Reaction conditions: 1-decene (10 ml), catalyst (2.0 g), 230 °C, 2.0 Mpa, 6 h.

Table S2. Screening test of different catalyst amount on 1-decene oligomerization.

| Catalyst amount [g] | Conversion [C <sub>10</sub> , %] | Cracking selectivity [%] | Selectivity [C <sub>20</sub> , %] | Selectivity [C <sub>30+40</sub> , %] | Target product selectivity [%] |
|---------------------|----------------------------------|--------------------------|-----------------------------------|--------------------------------------|--------------------------------|
| 0.1                 | 34.89                            | 3.61                     | 81.52                             | 14.87                                | 96.39                          |
| 0.5                 | 49.39                            | 3.11                     | 81.33                             | 15.56                                | 96.89                          |
| 1.0                 | 58.24                            | 3.49                     | 75.59                             | 20.92                                | 96.51                          |
| 2.0                 | 70.06                            | 3.29                     | 64.53                             | 32.18                                | 96.71                          |
| 3.0                 | 61.85                            | 6.03                     | 75.44                             | 18.53                                | 93.97                          |

Reaction conditions: 1-decene (10 ml), N-heptane (10 ml), 230 °C, 2.0 Mpa, 6 h.



Table S3 Acid site distribution of the fresh and used Al-MCM-41-X ( $\mu\text{mol g}^{-1}$ ).

| Sample             | B      | Bs     | L      | Ls     | B+L   |       |
|--------------------|--------|--------|--------|--------|-------|-------|
|                    | 250 °C | 350 °C | 250 °C | 350 °C | 250°C | 350°C |
| Fresh Al-MCM-41-15 | 64     | 47     | 108    | 76     | 172   | 123   |
| Used Al-MCM-41-15  | 56     | 45     | 108    | 74     | 164   | 119   |
